# Supplementary material
Source: publisher site journal article supplement (https://www.dovepress.com/article/257661)

**Table S1** P value of the Kaplan-Meier survival curve analysis using SPSS software

|  | ABL1 | KMT2C | FAT1 | ASXL1 | SETBP1 | GATA2 | TET2 | RUNX1 |
| --- | --- | --- | --- | --- | --- | --- | --- | --- |
| Log Rank | 0.475 | 0.143 | 0.728 | 0.646 | 0.766 | 0.19 | 0.007 | 0.428 |
| Breslow（Generalized Wilcoxon） | 0.61 | 0.189 | 0.855 | 0.473 | 0.713 | 0.249 | 0.003 | 0.686 |
| Tarone-Ware | 0.494 | 0.148 | 0.79 | 0.513 | 0.918 | 0.223 | 0.004 | 0.599 |

**Table S2** P value of analysis of mutated genes and clinical features at initial diagnosis

|  | WBC | HGB | PLT | EOS | BASO | SOKAL | EUTOS |
| --- | --- | --- | --- | --- | --- | --- | --- |
| ABL1 | 0.506 | 0.881 | 0.026 | 0.749 | 0.537 | 0.964 | 0.85 |
| KMT2C | 0.42 | 0.525 | 0.112 | 0.898 | 0.504 | 0.454 | 0.507 |
| FAT1 | 0.929 | 0.922 | 0.65 | 0.281 | 0.088 | 0.161 | 0.615 |
| ASXL1 | 0.914 | 0.777 | 0.065 | 0.885 | 0.031 | 0.854 | 0.955 |
| SETBP1 | 0.294 | 0.267 | 0.777 | 0.211 | 0.683 | 0.703 | 0.731 |
| GATA2 | 0.441 | 0.245 | 0.595 | 0.155 | 0.524 | 0.241 | 0.666 |
| TET2 | 0.873 | 0.162 | 0.576 |  | 0.193 | 1 | 0.094 |
| RUNX1 | 0.576 | 0.586 | 0.157 | 0.957 | 0.537 | 0.936 | 0.828 |

**Table S3** Relationship between TET2 mutation and clinical features at initial diagnosis

|  | number | Phase of disease (CP/AP+BC) | Time of PFS (months) | Sokal | EUTOS |
| --- | --- | --- | --- | --- | --- |
| TET2-pos | 10 | 3/7 | 20.5 (0,139) | 1.115 (0.23,2.32) | 83.15 (44,112) |
| TET2-neg | 53 | 42/11 | 39 (2,165) | 0.89 (0.11,0.24) | 57.6 (7,110) |
| P value |  | P=0.679a | P=0.421b | P=0.087b | P=0.047b |

a. Chi-square test

b. Wilcoxon rank sum test

Figure S1


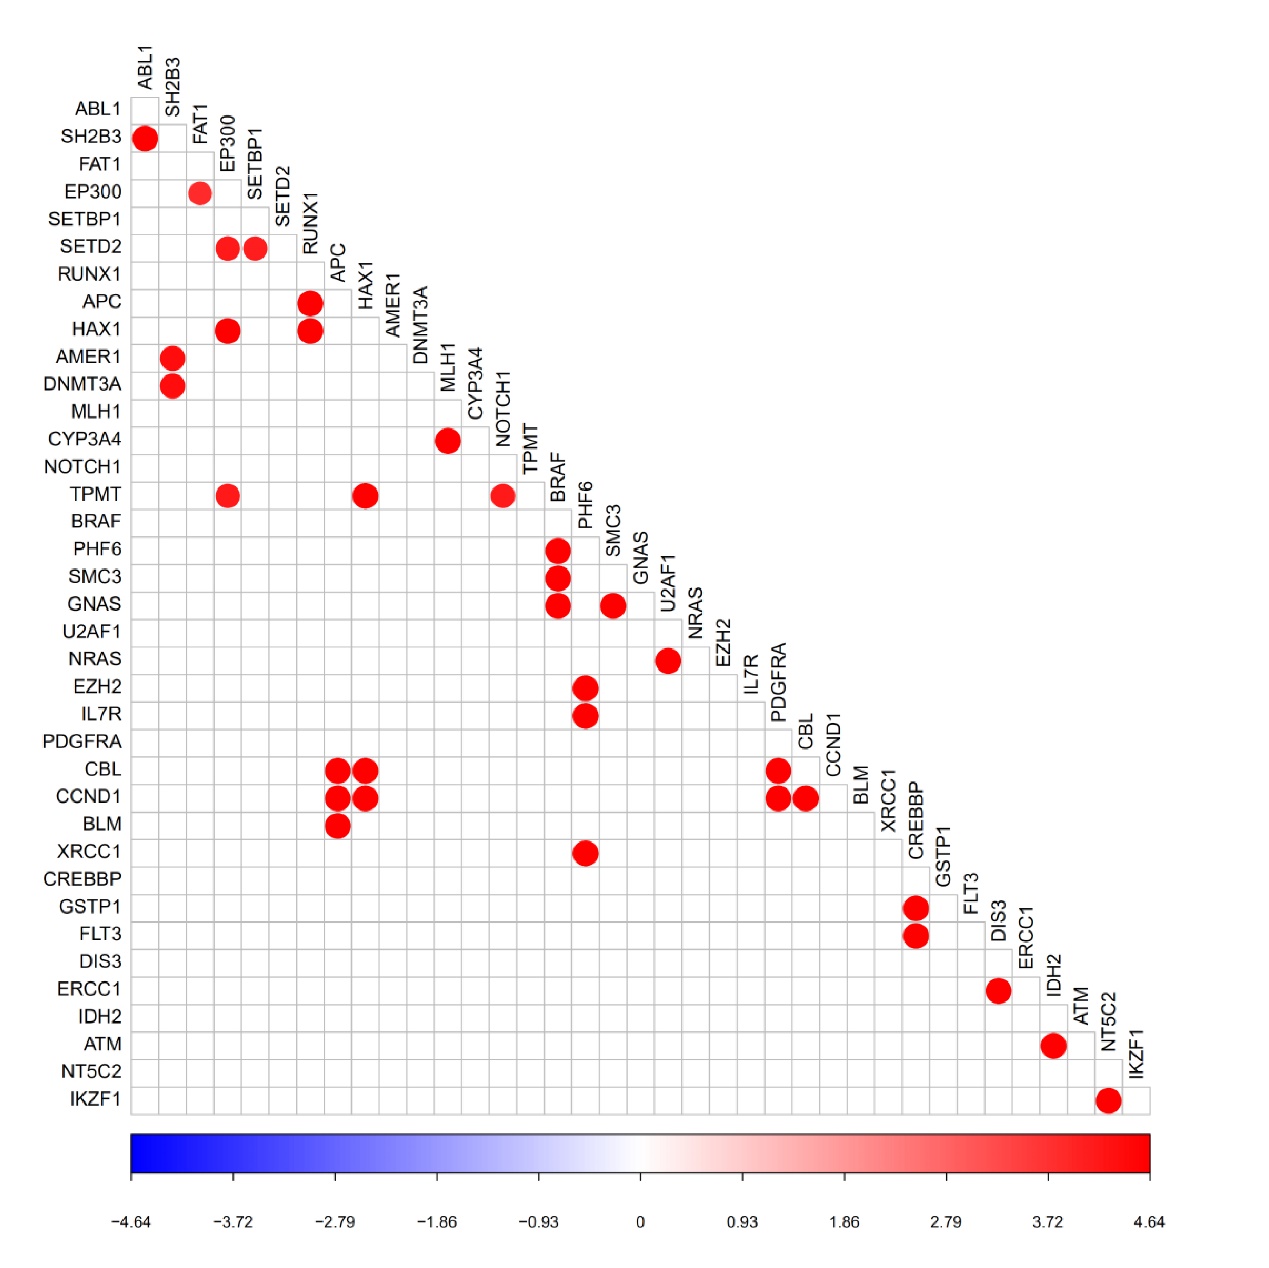

Supplement: Supplementary file 1 [file get_supplementary_file.php]
